# Supplementary material
Source: PubMed Central journal article supplement (PMC3188567)
Supplement: supp_137.9.1531_044750FigS3.pdf [file supp_137.9.1531_044750FigS3.pdf]

G AACACCAGACCTCCATGGTTAAAATGTTTCTATATTGATATGTAAATAGGTTATAAATCCCATGGTG  
TACTGTGAGGTCCTTCATTCAAGTAAGGAAAGCAGTCCACCATATCAATCTAGATGTAATCTTTCTTTAA  
TAACATCCACATTTCCCTAATTGCCACCTGCCGGTATTTTACCGGCCTGGCGGGTAAAAATGTTGCTT  
GATGCCAATGTTATGTATAGGGAAATACCACAATAATATAGAAAAGCCGGTATTTTTTTCCAGAAAAAG  
TGGCAACCCTAAATA **CACTGTAAGTTATTGCCTCAAAGG** AGAGCAGCTGTTTACAGTGATTTAGCCTC  
TGTTTTTGCCATTTCAAAATATGCTGTGCTCAGATTTTWTAGTTTTTCAAAATTGAAATGTTTGAATGG  
AC **TACAAAG** **cccacaagtattacaagct** TATTTACTCACATGAGGGAAGTATGTGCAACAGCCATAT  
ACAGTTATTGCTGCCATTGCATTTATCAAAATTTAGCCCCATTGAATTGTGGCCTTAGGTCAGTACTGCTT  
GTGCAATCCCAGAAATGCACTATGCACTATGAAGTTCCCTCACTACTGTCTGACACCAGTAAATATTTAA  
AGGGTGACTGTGACACAGAATAAA **GACAAAG** GTTTATAATGCTTACTGTGATGTAGTCGGTAATTT  
ATCAATAAAATTGGACAATCATCCCAATGCACCACACTCTACAGGCACAATTTGTATCCCATAACACT  
GACCCTGGTAGGCAGCAGACTTAGTTGGCGCAAATTCATATTTAATATATACCTCCATTTCTGAGAGC  
TTTACCACCATTCAAGTTTTTTTTCAGCAAAAATCCCAAATTTAAATTTATTGAGTGCACAAAACATGGA  
AGCGCAAATAAAAAAATaCTACTGGTAGAAGTCAATGTGAATCAATAGGAATGAAGGGCAGGTGTGATT  
TCACTGCATGTTTTCTTAACTTCTAAACAATCTAATTTTTCAATATTGAGTTTTCAAGTTTTTA TGT  
TTTTTAAATGAAAAAAAAAACTAAAAATTTTTTAATTTTTTATAAATCAGCCTCCATTTGTGTTTGTTC  
TTCTCCAGGCCTGGCAATCAACTGACTTCTGCAACACTGTTTCAAGAGTCAGAGCCAGGACAGCAAGAA  
TGTAACACAGGCACATTTCTGCTTTAAATAGCATTTACATTTACAAATTCCTTTAAAAACCTTTCAAGTT  
TTTTGTTTTAATAAATAAAGGAAAATTGCTTTGAATTATATTGCTCTAATTTGTGCAAAAACACTGTTTTG  
GGTGAAGTTCACTTTTCTCTGTAACCTTATGGTTCTGCTGGATAAATTTTCCATAGCAGGAGATTATGGA  
CTGGTGGGAAAAATTCAGGATATAGTGTTTGGAATAGGAGAACTTCTGTAAGTGTCTATAGTGCTTAG  
TGTTTACTATCCAATATAACATACCTAGTGA AAAAGATTTTTTCCAAATGTGTTGTGTTAAAGTGCACC  
TTGCAATAACCATACAGAGCGGAGGCAGAAAACCTCAGAGTTGTGTCGTGGCCATGGTTACATGTA  
AATACTGTGCAATTTCCGTGTATTTAAATACTTGGCAGATGACAGTAACATTAATTTTTTTCTTTTTCTTT  
TTTTGTGTTTTTAAACAGTCATAATTCCCTAGAAAAAAAAGTAATATGTCTTGCCCTTAAAAATTAGGAAC  
AATTGGCTGCTCCACGTAGACATTTTTGTAACCTGCTGGGAAAAATGCTTGAATGCAAAAATTCAAAACA  
GAGTTTTTATGCTGTCTTTTTCAGTAAAAGGAAAAAAAAATCCCTTTATGTGAATTTTCAGTCAAGAGCAGT  
TGCTGTGTCATTAAAGTGATAATGTAGAGGCAAACTGTTTTTTTTCAGGGGAGATAGCAAGCATTGTTGCC  
TGGCCAGAAGAATTCCTCCATTTGGCTAGATGTGAATGCTAATTCAGGGCAGTAGGTGCATGGATTG  
CACAGTCACACAGAGTGGGATGAGGGGAGGGGCTGGCCCAAGCTCACTGGCTGGCTGAGAAACAAGC  
CCAGTGACCAACACTAGCAGTGCAGGAGTTAAAGGCCCTT **CTATTTT** CGGATTTGCTCATTGCTGA  
AGGCTTGTAGTGGAGCTGGAGAAAAGGGAGGGAGACAGGAGCATCCCCTACACACAGCAAGA ACTGAG  
CATCTCCAAGAGGAAGGTAGGAGAGGAGCTGCTGCTGCACCATGCCAGTCTGAGACACACACACACAC  
ACACAGCCTGTGTTGGTTCTGTCTGGAGCTCAATCTCATCTCTGTCTCCATACTCACAGGAAGCCACAG  
TAAGGGGGTGCATAGACTGGAGCACCAACAGAGGAGGCTGTTTTGGGGGGCTGCCGTTTGCACACCTCCC  
TCTCTTCACTCCCCCACCCTGCTCCTGAAGATCATCAGTCATTTGGATTTTTGACAGATCTTGCA  
ACCTTGATGGACAGACAGAGAGAGCAGCTTTAAGATACCCAGAGAGGAGGGAAAATACGCACAGCTCC  
TGTTGGCTCTCCATGCTCTAGTCTCCAGCTTGGGCTTACCCTGGACTCAGGTCCACCTTGTTCCTTG  
CACTGAGGACACTTCCAGTCTTGTCAGGAAC **A** GCTGCCCTTCTTCCACAAGTCTCCAGGCGGACCC  
AACTCGGA **ATG**
