# Supplementary material
Source: PubMed Central journal article supplement (PMC3188567)

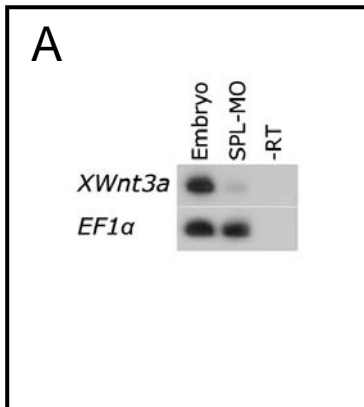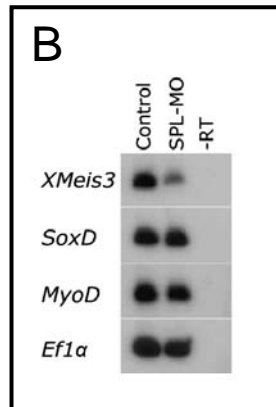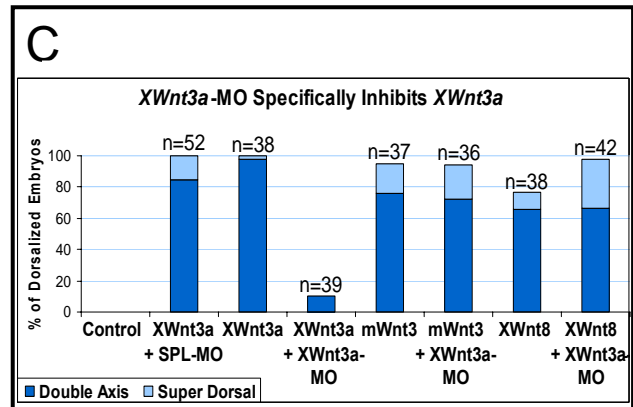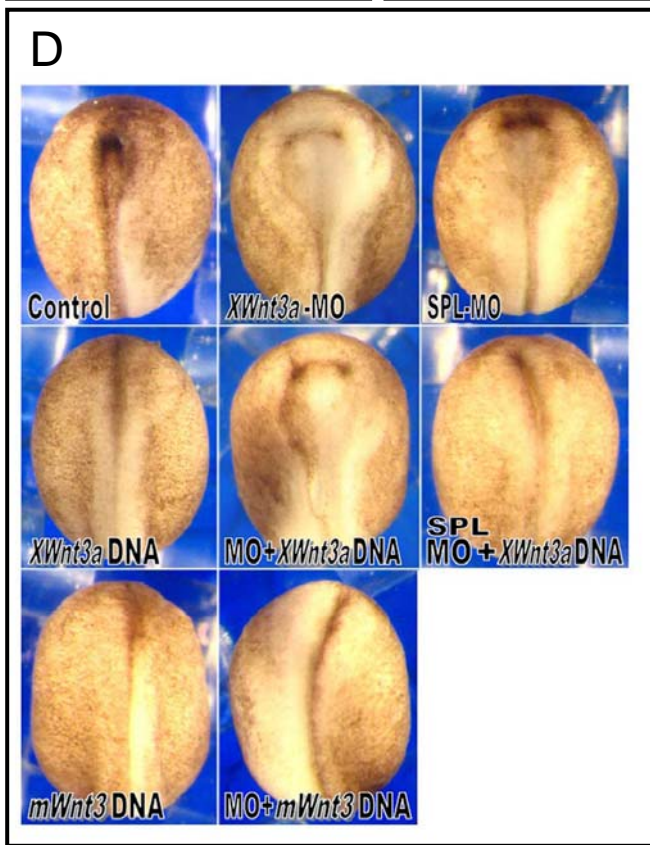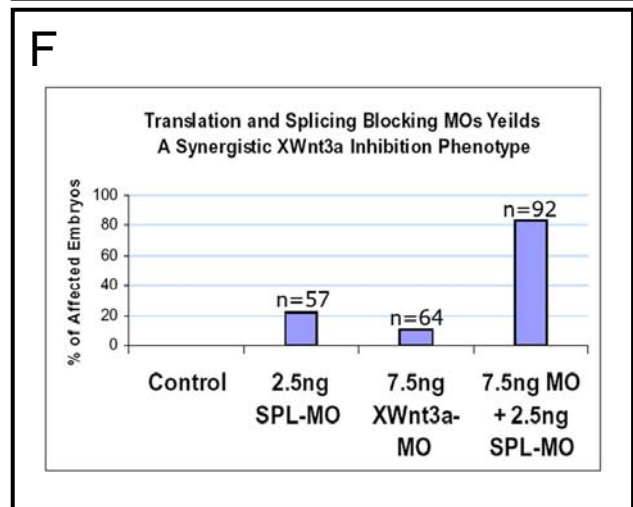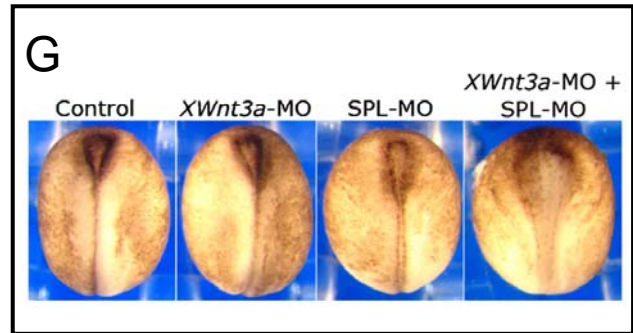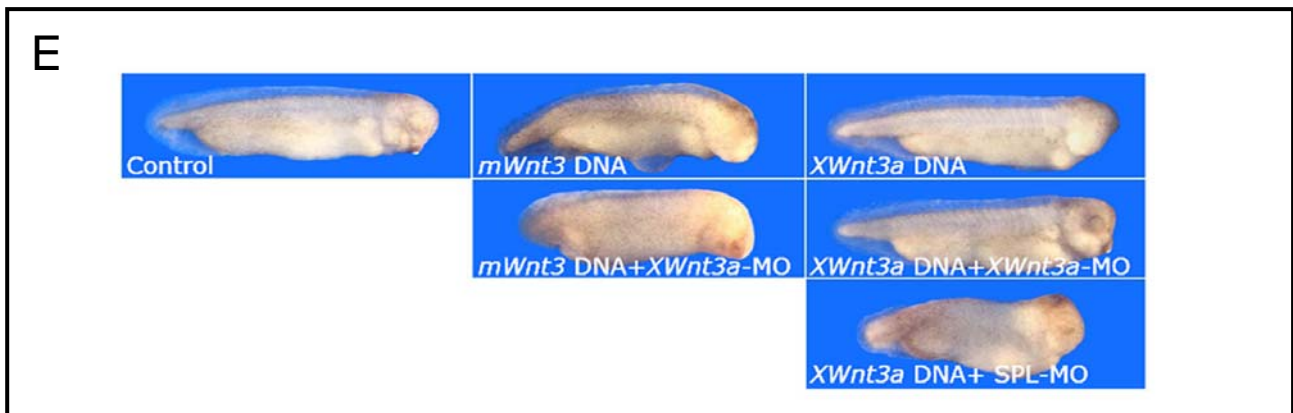

Supplement: supp_137.9.1531_044750FigS1.pdf [file supp_137.9.1531_044750FigS1.pdf]

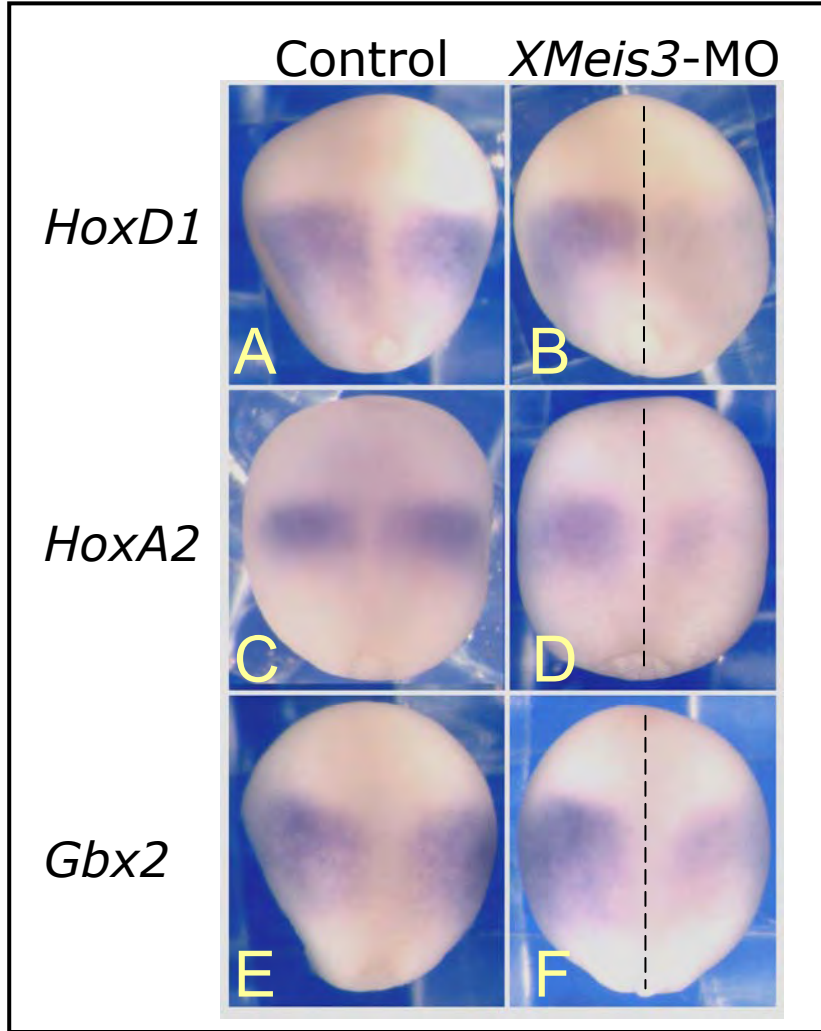

Supplement: supp_137.9.1531_044750FigS2.pdf [file supp_137.9.1531_044750FigS2.pdf]
